# Supplementary material
Source: HighWire-hosted journal article supplement (https://erj.ersjournals.com/content/58/3/2100377)

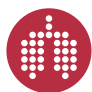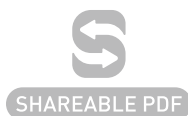

# Between inflammation and thrombosis: endothelial cells in COVID-19

Anna Birnhuber<sup>1,9</sup>, Elisabeth Fließer<sup>1,9</sup>, Gregor Gorkiewicz<sup>2</sup>, Martin Zacharias<sup>2</sup>, Benjamin Seeliger<sup>3</sup>, Sascha David<sup>4</sup>, Tobias Welte<sup>3</sup>, Julius Schmidt<sup>5</sup>, Horst Olschewski<sup>6</sup>, Malgorzata Wygrecka<sup>7,9</sup> and Grazyna Kwapiszewska<sup>1,8,9</sup>

<sup>1</sup>Ludwig Boltzmann Institute for Lung Vascular Research, Graz, Austria. <sup>2</sup>Diagnostic and Research Institute of Pathology, Medical University Graz, Graz, Austria. <sup>3</sup>Dept of Respiratory Medicine, Hannover Medical School, Hannover, Germany. <sup>4</sup>Institute of Intensive Care, University Hospital Zurich, Zurich, Switzerland. <sup>5</sup>Dept of Nephrology and Hypertension, Hannover Medical School, Hannover, Germany. <sup>6</sup>Division of Pulmonology, Medical University of Graz, Graz, Austria. <sup>7</sup>Center for Infection and Genomics of the Lung, Universities of Giessen and Marburg Lung Center, Member of the German Center for Lung Research, Giessen, Germany. <sup>8</sup>Otto Loewi Research Center, Medical University of Graz, Graz, Austria. <sup>9</sup>Authors contributed equally.

Grazyna Kwapiszewska (Grazyna.Kwapiszewska@lvr.lbg.ac.at)

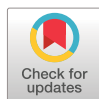

Shareable abstract (@ERSpublications)

**Elevated levels of several endothelial markers, including CD31, VEGFR-2, ICAM-1, VCAM-1, E-selectin, P-selectin and vWF, in lung tissue and circulation support an important role of the pulmonary endothelium in local and systemic COVID-19 pathology** <https://bit.ly/3eQObIR>

**Cite this article as:** Birnhuber A, Fließer E, Gorkiewicz G, *et al.* Between inflammation and thrombosis: endothelial cells in COVID-19. *Eur Respir J* 2021; 58: 2100377 [DOI: 10.1183/13993003.00377-2021].

This single-page version can be shared freely online.

Copyright ©The authors 2021.

This version is distributed under the terms of the Creative Commons Attribution Non-Commercial Licence 4.0. For commercial reproduction rights and permissions contact [permissions@ersnet.org](mailto:permissions@ersnet.org)

Received: 27 Nov 2020

Accepted: 26 April 2021

*To the Editor:*

Severe acute respiratory syndrome coronavirus 2 (SARS-CoV-2) is causing the current coronavirus disease (COVID-19) pandemic [1]. Over recent months, a plethora of novel research articles has been published, dealing with multiple aspects and manifestations of the disease. Increasing evidence points to a central role of endothelial cells in SARS-CoV-2 infection [2–5]. Early studies have already indicated increased expression of vascular and inflammatory factors (such as vascular cell adhesion molecule (VCAM)-1, interleukin (IL)-8 or monocyte-chemoattractant protein (MCP)-1) in COVID-19 lung tissue [2]. Such markers of endothelial dysfunction and altered endothelial cell integrity are important predictors of a poor outcome in SARS-CoV-2 infections [6], and they are associated with pulmonary oedema, intravascular thrombosis and acute respiratory distress syndrome (ARDS). The pulmonary endothelium is crucial for regulation of vascular tone, inflammatory responses, coagulation/fibrinolysis and maintenance of vascular homeostasis and permeability. Disturbances of these tightly regulated processes may directly contribute to morbidity and mortality. However, the exact mechanisms leading to pulmonary vasculopathy in COVID-19 are still unclear. Here, we provide an analysis of several important vascular markers implicated in the inflammatory response (E-selectin, intercellular cell adhesion molecule (ICAM)-1, VCAM-1), maintenance of microvascular integrity (CD31, vascular endothelial growth factor receptor (VEGFR)-2), platelet activation and coagulation (P-selectin, von Willebrand factor (vWF)) in lung tissue and plasma samples of COVID-19 patients.

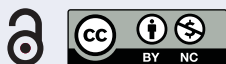

Supplement: inline-supplementary-material-1 [file inline-supplementary-material-1.pdf]
